# Supplementary material for: Insights into DFG-in and DFG-out JAK2 binding modes for a rational strategy of type II inhibitors combined computational study
Source: Royal Society of Chemistry journal article supplement (doi:10.1039/c6ra06266k), 2016-01-01

## Supporting Information

### Insights into DFG-in and DFG-out JAK2 binding modes for a rational strategy of type II inhibitors combined computational study

Jiao Jiao Li, Jing Tu, Peng Cheng, Hong Lin Zhai\*, Xiao Yun Zhang

*College of Chemistry & Chemical Engineering, Lanzhou University, Lanzhou, 730000, PR China*

Table S1. The structures, pIC<sub>50</sub> values and the corresponding docking scores for the type I JAK2 inhibitors.

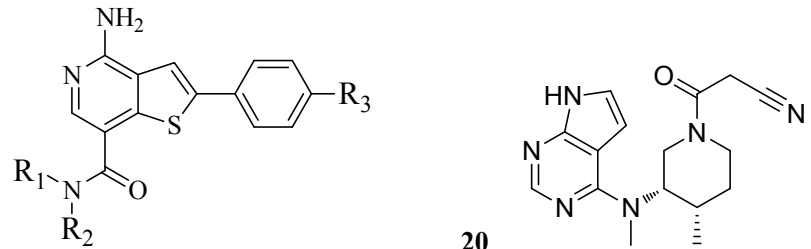

| Compound  | R <sub>1</sub> | R <sub>2</sub>     | R <sub>3</sub>                                                                      | pIC <sub>50</sub> | Docking score |
|-----------|----------------|--------------------|-------------------------------------------------------------------------------------|-------------------|---------------|
| <b>3</b>  | H              | H                  |  | 7.72              | -9.437        |
| <b>8</b>  | H              | Me                 |  | 7.51              | -9.112        |
| <b>9</b>  | H              | Et                 |  | 7.32              | -6.901        |
| <b>10</b> | H              | Ph                 |  | 7.14              | -8.267        |
| <b>11</b> | H              | CH <sub>2</sub> Ph |  | 7.00              | -6.977        |
| <b>12</b> | H              | <sup>t</sup> Bu    |  | 5.93              | -8.364        |
| <b>13</b> | Me             | Me                 |  | 5.93              | -5.237        |
| <b>14</b> | H              | Me                 | H                                                                                   | 7.24              | -9.436        |
| <b>15</b> | H              | Me                 | Me                                                                                  | 7.57              | -10.036       |
| <b>16</b> | H              | Me                 | <sup>t</sup> Bu                                                                     | 8.00              | -9.838        |
| <b>17</b> | H              | Me                 | OCF <sub>3</sub>                                                                    | 7.92              | -9.476        |

\* Correspondence to: Tel.: +86 931 8912596; fax: +86 931 8912582; E-mail address: zhahl@163.com (H.L. Zhai).

|           |                                                                                     |    |                                                                                     |      |         |
|-----------|-------------------------------------------------------------------------------------|----|-------------------------------------------------------------------------------------|------|---------|
| <b>18</b> | H                                                                                   | Me |    | 8.40 | -9.859  |
| <b>19</b> | H                                                                                   | Me |    | 9.00 | -10.298 |
| <b>20</b> |                                                                                     |    |                                                                                     | 8.40 | -9.069  |
| <b>21</b> |    | H  |    | 8.10 | -11.149 |
| <b>22</b> |    | H  |    | 8.52 | -10.368 |
| <b>23</b> |    | H  |    | 8.10 | -10.521 |
| <b>24</b> |    | H  |    | 8.30 | -11.151 |
| <b>25</b> |   | H  |   | 8.70 | -11.304 |
| <b>26</b> |  | H  |  | 8.30 | -10.917 |

Table 2S Hydrogen bonds analysis for the complexes **25**-JAK2-in and **12**-JAK2-in from MD simulation.

| Complex            | Donor               | Acceptor        | Distance (Å) | Angle (°) | Occupancy (%) |
|--------------------|---------------------|-----------------|--------------|-----------|---------------|
| <b>25</b> -JAK2-in | <b>25</b> (N16-H43) | Glu930(O)       | 2.870        | 19.08     | 73.73         |
|                    | <b>25</b> (N24-H47) | Asp994(OD1)     | 2.874        | 17.36     | 59.13         |
|                    | Leu932(N-H)         | <b>25</b> (N1)  | 2.921        | 16.35     | 52.27         |
|                    | <b>25</b> (N18-H44) | Leu932(O)       | 2.913        | 33.04     | 16.53         |
| <b>12</b> -JAK2-in | Leu932(N-H)         | <b>12</b> (N1)  | 2.932        | 15.70     | 30.36         |
|                    | Arg980(NH1-HH12)    | <b>12</b> (O22) | 2.880        | 16.83     | 24.38         |

Table 3S

| Complex             | Donor               | Acceptor        | Distance<br>(Å) | Angle<br>(°) | Occupancy<br>(%) |
|---------------------|---------------------|-----------------|-----------------|--------------|------------------|
| <b>BC1-JAK2-out</b> | Asp994(N-H)         | <b>BC1(O23)</b> | 2.872           | 21.24        | 60.60            |
|                     | <b>BC1(N31-H54)</b> | Glu898(OE2)     | 2.818           | 18.11        | 51.72            |
|                     | <b>BC1(N7-H35)</b>  | Leu932(O)       | 2.890           | 33.06        | 35.36            |
|                     | <b>BC1(N24-H48)</b> | Glu898(OE2)     | 2.901           | 15.90        | 28.52            |
|                     | Leu932(N-H)         | <b>BC1(N2)</b>  | 2.931           | 22.00        | 27.72            |
| <b>C1-JAK2-out</b>  | <b>C1(N21-H40)</b>  | Glu898(OE2)     | 2.854           | 15.82        | 74.55            |
|                     | Leu932(N-H)         | <b>C1(N2)</b>   | 2.917           | 20.13        | 56.35            |
|                     | <b>C1(N7-H34)</b>   | Leu932(O)       | 2.900           | 32.23        | 36.50            |
|                     | Asp994(N-H)         | <b>C1(N20)</b>  | 2.928           | 16.37        | 29.60            |

Fig. 1S Time evolution of the RMSD values for four complexes of JAK2-in with type I inhibitors (12, 13, 22 and 25). (a) all protein backbone atoms; (b)  $C_{\alpha}$  atoms for the residues around 5 Å of the ligand; (c) the heavy atoms for the ligand.

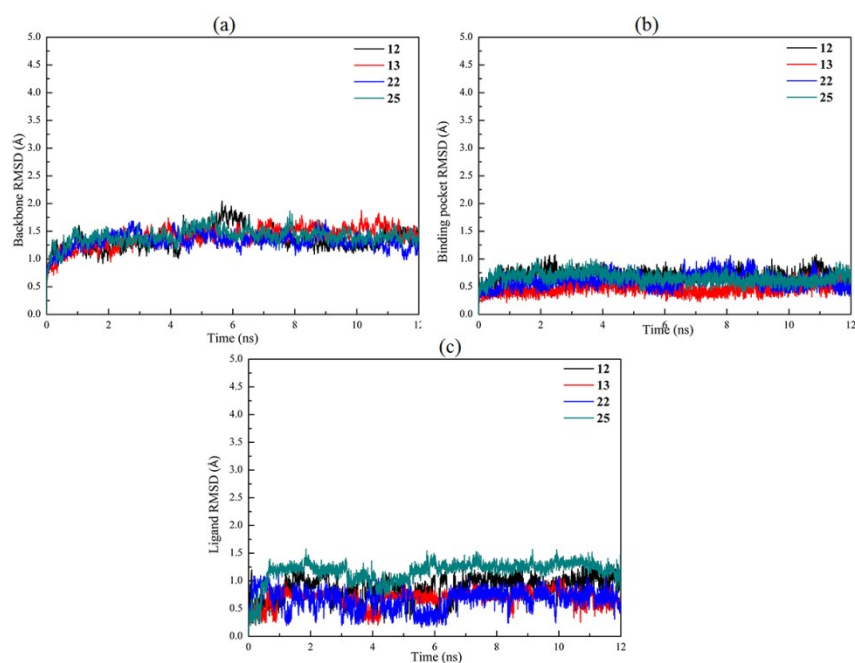

Fig. 2S Time series of the RMSDs of all protein backbone atoms,  $C_{\alpha}$  atoms for the residues around 5 Å of the ligand and the heavy atoms for the ligand for the complexes (a) **BBT594-JAK2-**

out and (b) **CHZ868**-JAK2-out.

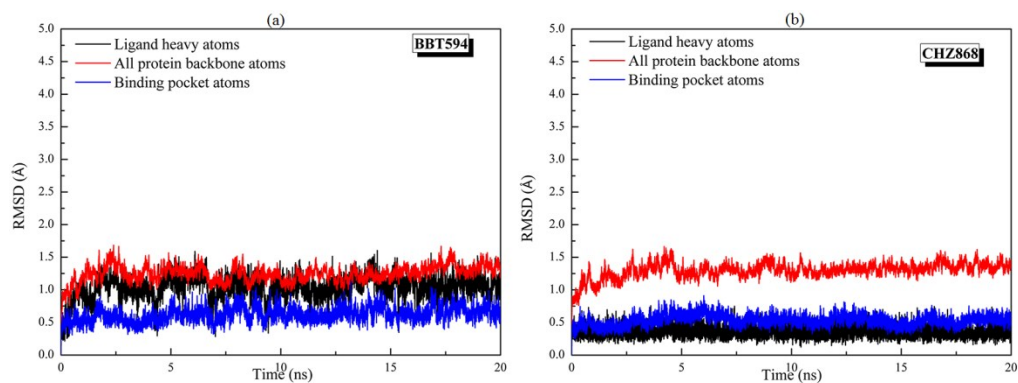

Fig. 3S (a) The comparison of the averaged structures for the **25**-JAK2-in and **12**-JAK2-in complexes (carbon atoms are colored in red and green, respectively); (b) energy difference of each residue to the binding of inhibitors **25** and **12**; (c) the contributions of the individual energy terms for the key residues ( $\Delta G_{\text{polar}}$  is marked in red and blue, and  $\Delta G_{\text{nonpolar}}$  is marked in magenta and navy in **25**-JAK2-in and **12**-JAK2-in, respectively).

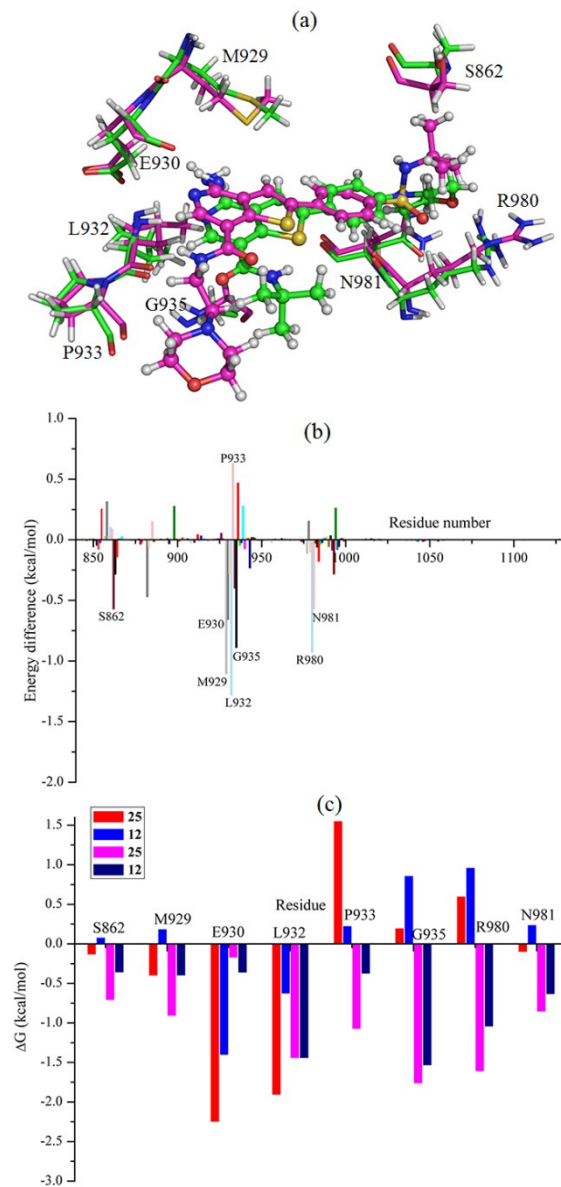

Fig. 4S Time series of the RMSDs of all protein backbone atoms,  $C_{\alpha}$  atoms for the residues around 5 Å of the ligand and the heavy atoms for the ligand for the complexes (a) **BC1**-JAK2-out and (b) **C1**-JAK2-out.

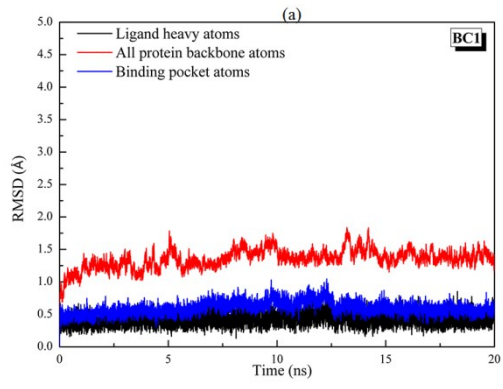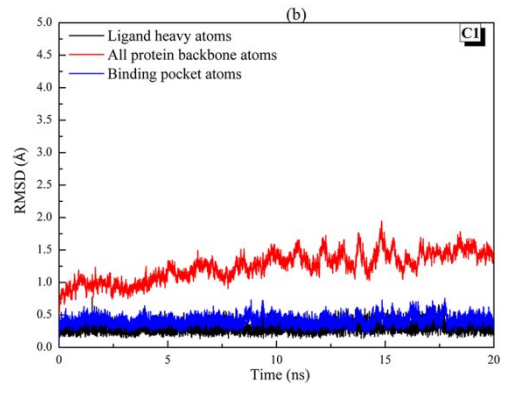

Supplement: c6ra06266k1.pdf [file c6ra06266k1.pdf]
